# Supplementary material for: Zinc oxide nanorods functionalized paper for protein preconcentration in biodiagnostics
Source: PubMed Central journal article supplement (PMC5333162; doi:10.1038/srep43905), 2017-03-02
Supplement: srep43905-s1.pdf [file srep43905-s1.pdf]

## Supporting Information

# Zinc oxide nanorods functionalized paper for protein preconcentration in biodiagnostics

Sadhana Tiwari,<sup>1,2</sup> Madhuri Vinchurkar,<sup>1</sup> V. Ramgopal Rao<sup>1</sup> and Gil Garnier<sup>2\*</sup>

1. Department of Electrical Engineering, Indian Institute of Technology Bombay, Mumbai 400076, India.
2. BioPRIA, Chemical Engineering department, Monash University Clayton VIC 3800, Australia. \* Corresponding author; e-mail: gil.garnier@monash.edu.

### S1. EDX spectroscopic study:

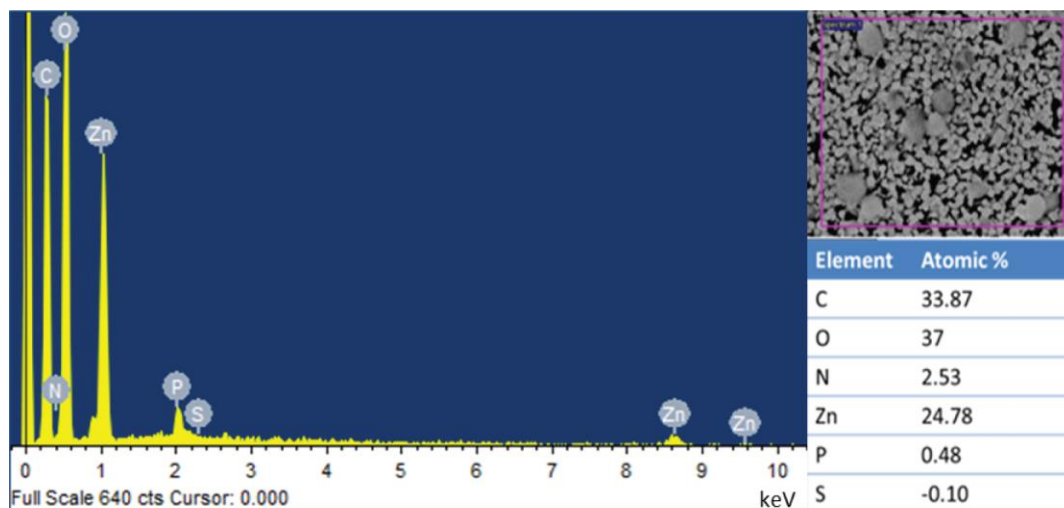

Figure S1: EDX spectra of ZnO-NRs/WFP showing atomic concentration of different elements.

## S2. Nanorods on paper area and density calculation:

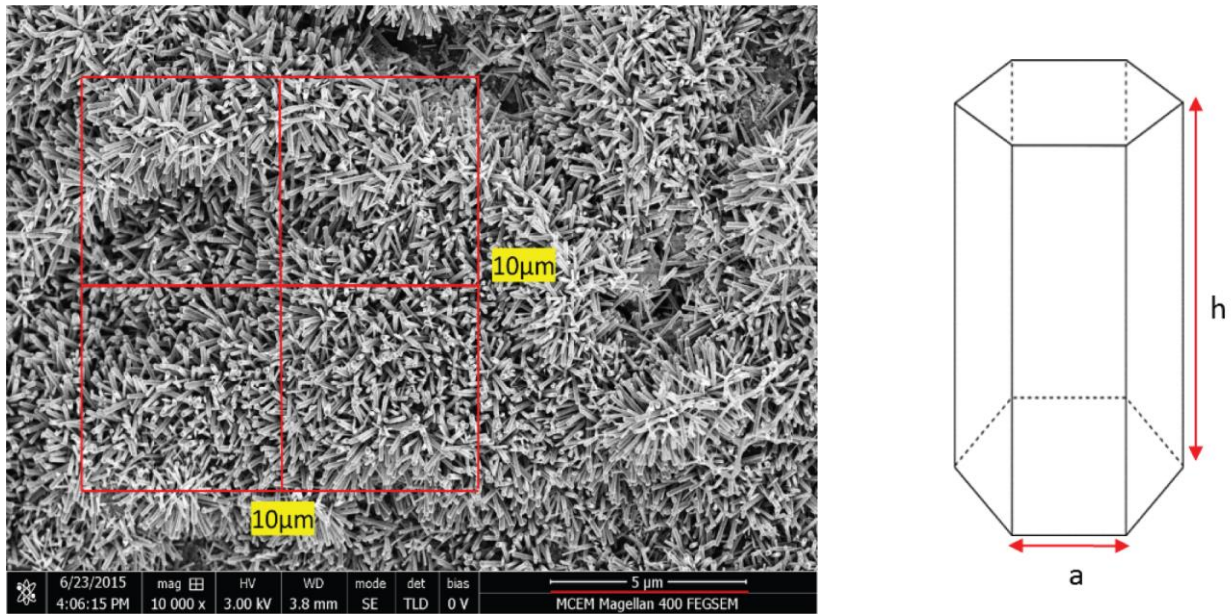

Figure S2: SEM image of ZnO-NRs/WFP and shape of individual rod obtained from SEM and used for calculations.

### 2.1 Surface area calculation:

Shape of nanorod is like hexagonal prism

Parameter calculated from SEM image:

No. of nanorods in  $100\mu\text{m}^2$  is 1000

Height(h):  $1\mu\text{m}$

Diagonal(D): 200nm

Edge length(a):  $D/2 = 100\text{nm}$

Area of a hexagonal prism =  $3\sqrt{3}a^2 + 6ah$

Hence, area of one nanorod =  $6.5 \times 10^{-13} \text{ m}^2 = 0.65 \mu\text{m}^2$

Area of 1000 rods will be =  $650 \mu\text{m}^2$

### 2.2 No. of nanorods/ $\text{m}^2$ calculation:

Approximate no. of nanorods in  $100\mu\text{m}^2$  area is 1000(from SEM image).

No. of rods/m<sup>2</sup> will be:

#rods in 10<sup>-4</sup>m<sup>2</sup> is =1000, assuming uniform distribution

In 1m<sup>2</sup> = 1000/10<sup>-4</sup> = 10<sup>7</sup> rods/m<sup>2</sup>

So, density of rods= 10<sup>7</sup> rods/m<sup>2</sup>

Surface coverage of paper by nanorods is about 90% as seen by SEM images.

Therefore, increase in surface area will be= density of rods x area of one rod

$$\begin{aligned} &= 6.5 \times 10^{-13} \times 10^7 \\ &= 6.5 \times 10^{-6} \text{ m}^2 \text{ or } 6.5 \times 10^6 \mu\text{m}^2 \\ &= 7 \times 10^6 \mu\text{m}^2 \end{aligned}$$

### S3. Relation with increase in fluorescence

| Sample      | Average Intensity |
|-------------|-------------------|
| WFP         | 6440184           |
| ZnO-NRs/WFP | 22101495          |

Percent increase in fluorescence intensity=

$$\frac{\text{FinalIntensity} - \text{InitialIntensity}}{\text{InitialIntensity}} \times 100$$

Which gives,

$$= \frac{22101495 - 6440184}{6440184} \times 100$$

> 200% increase in fluorescence.
